# Supplementary material for: Persistence of neutralizing antibodies a year after SARS-CoV-2 infection
Source: bioRxiv or medRxiv preprint supplement (doi:10.1101/2021.07.13.21260426), 2021-07-16

**Supplementary Figure 1.** Spearman correlation ( $\rho$ ) and significance ( $p$ ) between neutralizing antibody (NAb) titers against the wild-type virus (B.1) and variants of concern: Alpha (B.1.1.7), Beta (B.1.351) and Delta (B.1.617.2). One point may represent multiple samples ( $n=78$ ).

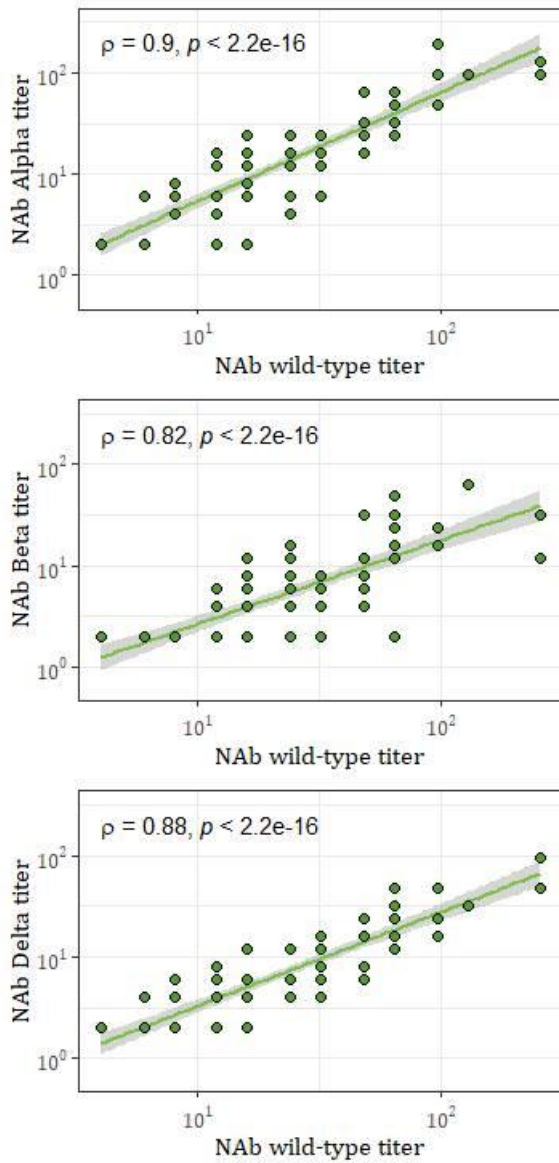

Supplement: Supplementary file [file media-1.pdf]
