# Supplementary material for: Persistence of neutralizing antibodies a year after SARS-CoV-2 infection
Source: bioRxiv or medRxiv preprint supplement (doi:10.1101/2021.07.13.21260426), 2021-07-16
Supplement: Supplementary file [file media-2.pdf]

**Supplementary Table 1.** The proportion of subjects (M=male; F=female) positive for nucleoprotein (N) and spike proteins (SFL and RBD) IgG antibodies and the proportion of subjects positive and low positive (borderline) for neutralizing antibodies (NAb) twelve months after infection against four SARS-CoV-2 virus strains (n=78).

| Disease severity | Age  | Gender | n  | IgG positivity% |             |             | MNT positivity (%)<br><i>MNT borderline (%)</i> |                        |                         |                         |
|------------------|------|--------|----|-----------------|-------------|-------------|-------------------------------------------------|------------------------|-------------------------|-------------------------|
|                  |      |        |    | N-IgG           | S-IgG (RBD) | S-IgG (SFL) | NAb wt                                          | NAb Alpha              | NAb Beta                | NAb Delta               |
| Severe           | <60y | M+F    | 22 | 18/22 (82)      | 22/22 (100) | 22/22 (100) | 22/22 (100)                                     | 21/22 (95)             | 14/22 (64)<br>2/22 (9)  | 18/22 (82)<br>2/22 (9)  |
|                  |      | M      | 12 | 10/12 (83)      | 12/12 (100) | 12/12 (100) | 12/12 (100)                                     | 12/12 (100)            | 8/12 (67)               | 10/12 (83)<br>2/12 (17) |
|                  |      | F      | 10 | 8/10 (80)       | 10/10 (100) | 10/10 (100) | 10/10 (100)                                     | 9/10 (90)              | 6/10 (60)<br>2/10 (20)  | 8/10 (80)               |
|                  | ≥60v | M+F    | 17 | 14/17 (82)      | 17/17 (100) | 17/17 (100) | 17/17 (100)                                     | 17/17 (100)            | 11/17 (65)<br>2/17 (12) | 16/17 (94)<br>1/17 (6)  |
|                  |      | M      | 8  | 6/8 (75)        | 8/8 (100)   | 8/8 (100)   | 8/8 (100)                                       | 8/8 (100)              | 5/8 (63)<br>2/8 (25)    | 8/8 (100)               |
|                  |      | F      | 9  | 8/9 (89)        | 9/9 (100)   | 9/9 (100)   | 9/9 (100)                                       | 9/9 (100)              | 6/9 (67)                | 8/9 (89)<br>1/9 (11)    |
| Mild             | <60v | M+F    | 22 | 11/22 (50)      | 22/22 (100) | 22/22 (100) | 22/22 (100)                                     | 16/22 (73)<br>2/22 (9) | 9/22 (41)<br>1/22 (5)   | 8/22 (37)<br>3/22 (14)  |
|                  |      | M      | 12 | 6/12 (50)       | 12/12 (100) | 12/12 (100) | 12/12 (100)                                     | 6/12 (50)<br>2/12 (17) | 3/12 (25)<br>1/12 (8)   | 2/12 (17)<br>2/12 (17)  |
|                  |      | F      | 10 | 5/10 (50)       | 10/10 (100) | 10/10 (100) | 10/10 (100)                                     | 10/10 (100)            | 6/10 (60)               | 6/10 (60)<br>1/10 (10)  |
|                  | ≥60v | M+F    | 17 | 9/17 (53)       | 17/17 (100) | 17/17 (100) | 16/17 (94)<br>1/17 (6)                          | 11/17 (65)<br>1/17 (6) | 8/17 (47)               | 10/17 (59)<br>1/17 (6)  |
|                  |      | M      | 8  | 6/8 (75)        | 8/8 (100)   | 8/8 (100)   | 7/8 (88)<br>1/8 (13)                            | 3/8 (38)<br>1/8 (13)   | 2/8 (25)                | 3/8 (38)<br>1/8 (13)    |
|                  |      | F      | 9  | 3/9 (33)        | 9/9 (100)   | 9/9 (100)   | 9/9 (100)                                       | 8/9 (89)               | 6/9 (67)                | 7/9 (78)                |
