# Supplementary material for: Persistence of neutralizing antibodies a year after SARS-CoV-2 infection
Source: bioRxiv or medRxiv preprint supplement (doi:10.1101/2021.07.13.21260426), 2021-07-16
Supplement: Supplementary file [file media-3.pdf]

**Supplementary Table 2.** Statistical analysis of neutralizing antibody titers against variant viruses Alpha (B.1.1.7), Beta (B.1.351) and Delta (B.1.617.2) compared to wild type (B1) virus (n=78). Kruskal-Wallis test with adjusted p-values.

|                             | <b>Alpha variant (B.1.1.7)</b> | <b>Beta variant (B.1.351)</b> | <b>Delta variant (B.1.617.2)</b> |
|-----------------------------|--------------------------------|-------------------------------|----------------------------------|
| <b>Wild-type virus (B1)</b> | 0.0000000280                   | 0.0000000037                  | 0.00000000086                    |
