# Supplementary material for: Persistence of neutralizing antibodies a year after SARS-CoV-2 infection
Source: bioRxiv or medRxiv preprint supplement (doi:10.1101/2021.07.13.21260426), 2021-07-16
Supplement: Supplementary file [file media-4.pdf]

**Supplementary Table 3.** Influence of gender and disease severity twelve months after infection on spike protein IgG concentrations (SFL, RBD) and neutralizing antibody titers against wild-type (B.1) virus and variant viruses Alpha (B.1.1.7), Beta (B.1.351) and Delta (B.1.617.2) (n=78). Kruskal-Wallis with Bonferroni correction, adjusted p-values. P-values <0.05 are marked in bold.

| Compared groups |               | Wild-type virus (B1) | Alpha variant (B.1.1.7) | Beta variant (B.1.351) | Delta variant (B.1.617.2) | IgG-SFL        | IgG-RBD       |
|-----------------|---------------|----------------------|-------------------------|------------------------|---------------------------|----------------|---------------|
| Male mild       | Male severe   | <b>0.0029</b>        | <b>0.000033</b>         | <b>0.0013</b>          | <b>0.000045</b>           | <b>0.00022</b> | <b>0.0024</b> |
| Female mild     | Female severe | 0.51                 | 1.00                    | 1.00                   | 0.82                      | 0.29           | 0.41          |
| Female mild     | Male mild     | 0.19                 | <b>0.047</b>            | 0.34                   | 0.15                      | 0.28           | 0.55          |
| Female severe   | Male severe   | 1.00                 | 1.00                    | 1.00                   | 1.00                      | 1.00           | 1.00          |
| Female severe   | Male mild     | <b>0.0006</b>        | <b>0.00041</b>          | <b>0.033</b>           | <b>0.0011</b>             | <b>0.00041</b> | <b>0.0024</b> |
| Female mild     | Male severe   | 1.00                 | 0.40                    | 0.48                   | 0.18                      | 0.22           | 0.42          |
